# Supplementary material
Source: HighWire-hosted journal article supplement (https://jnm.snmjournals.org/highwire/filestream/104684/field_highwire_adjunct_files/0/262136_Supplemental_Data.pdf)
Supplement: 262136_Supplemental_Data.pdf [file 262136_Supplemental_Data.pdf]

| Supplemental Table 1 Baseline patient characteristics |                                               |                   |                | No. of tumors                                                                                                                                                                                                                                                                                                                                                                                                                                                                       |           |            | 0.02 |
|-------------------------------------------------------|-----------------------------------------------|-------------------|----------------|-------------------------------------------------------------------------------------------------------------------------------------------------------------------------------------------------------------------------------------------------------------------------------------------------------------------------------------------------------------------------------------------------------------------------------------------------------------------------------------|-----------|------------|------|
| Characteristics                                       | TACE+ <sup>131</sup> I-metuximab<br>(n = 160) | TACE<br>(n = 160) | <i>P</i> value | Single                                                                                                                                                                                                                                                                                                                                                                                                                                                                              | 20 (13%)  | 30 (19%)   |      |
|                                                       |                                               |                   |                | Multiple                                                                                                                                                                                                                                                                                                                                                                                                                                                                            | 132 (83%) | 129 (81%)  |      |
| Age, years                                            |                                               |                   | 0.18           | Diffuse                                                                                                                                                                                                                                                                                                                                                                                                                                                                             | 8 (5%)    | 1 (1%)     |      |
| Median                                                | 57                                            | 58                |                | ALT, μ/L                                                                                                                                                                                                                                                                                                                                                                                                                                                                            |           |            | 0.34 |
| IQR                                                   | 47.3–64.0                                     | 49.3–65.8         |                | Median                                                                                                                                                                                                                                                                                                                                                                                                                                                                              | 30        | 29         |      |
| Gender                                                |                                               |                   | 0.86           | IQR                                                                                                                                                                                                                                                                                                                                                                                                                                                                                 | 23.0–58.0 | 28.0–94.5  |      |
| Male                                                  | 141 (88%)                                     | 142 (89%)         |                | AST, μ/L                                                                                                                                                                                                                                                                                                                                                                                                                                                                            |           |            | 0.85 |
| Female                                                | 19 (12%)                                      | 18 (11%)          |                | Median                                                                                                                                                                                                                                                                                                                                                                                                                                                                              | 41        | 41         |      |
| Cause of disease                                      |                                               |                   | 0.08           | IQR                                                                                                                                                                                                                                                                                                                                                                                                                                                                                 | 28.0–77.5 | 36.0–108.0 |      |
| Hepatitis B only                                      | 133 (83%)                                     | 129 (81%)         |                | TBIL, μmol/L                                                                                                                                                                                                                                                                                                                                                                                                                                                                        |           |            | 0.76 |
| Hepatitis C only                                      | 13 (8%)                                       | 10 (6%)           |                | Median                                                                                                                                                                                                                                                                                                                                                                                                                                                                              | 17.8      | 16.9       |      |
| Hepatitis B and C                                     | 3 (4%)                                        | 0                 |                | IQR                                                                                                                                                                                                                                                                                                                                                                                                                                                                                 | 12.4–23.4 | 14.9–32.8  |      |
| Unknown                                               | 11 (7%)                                       | 21 (13%)          |                | ALB, g/L                                                                                                                                                                                                                                                                                                                                                                                                                                                                            |           |            | 0.85 |
| Hepatic cirrhosis                                     |                                               |                   | 0.36           | Median                                                                                                                                                                                                                                                                                                                                                                                                                                                                              | 41.9      | 41.5       |      |
| Yes                                                   | 146 (91%)                                     | 141 (88%)         |                | IQR                                                                                                                                                                                                                                                                                                                                                                                                                                                                                 | 36.9–45.1 | 33.5–40.1  |      |
| No                                                    | 14 (9%)                                       | 19 (12%)          |                | Macroscopic vascular invasion                                                                                                                                                                                                                                                                                                                                                                                                                                                       |           |            | 0.19 |
| Child-Pugh class                                      |                                               |                   | 0.07           | Yes                                                                                                                                                                                                                                                                                                                                                                                                                                                                                 | 48 (30%)  | 59 (37%)   |      |
| A                                                     | 138 (86%)                                     | 148 (96%)         |                | No                                                                                                                                                                                                                                                                                                                                                                                                                                                                                  | 112 (70%) | 101 (63%)  |      |
| B                                                     | 22 (14%)                                      | 12 (8%)           |                | Extrahepatic spread                                                                                                                                                                                                                                                                                                                                                                                                                                                                 |           |            | 0.43 |
| BCLC stage                                            |                                               |                   | 0.19           | Yes                                                                                                                                                                                                                                                                                                                                                                                                                                                                                 | 35 (22%)  | 41 (26%)   |      |
| B                                                     | 60 (38%)                                      | 49 (31%)          |                | No                                                                                                                                                                                                                                                                                                                                                                                                                                                                                  | 125 (78%) | 119 (74%)  |      |
| C                                                     | 100 (63%)                                     | 111 (69%)         |                | Previous therapy*                                                                                                                                                                                                                                                                                                                                                                                                                                                                   |           |            |      |
| ECOG performance status                               |                                               |                   | < 0.001        | No                                                                                                                                                                                                                                                                                                                                                                                                                                                                                  | 13 (8%)   | 24 (15%)   | 0.05 |
| 0                                                     | 86 (54%)                                      | 120 (75%)         |                | Surgical resection                                                                                                                                                                                                                                                                                                                                                                                                                                                                  | 47 (29%)  | 34 (21%)   | 0.10 |
| 1                                                     | 66 (41%)                                      | 40 (25%)          |                | Chemotherapy                                                                                                                                                                                                                                                                                                                                                                                                                                                                        | 13 (8%)   | 22 (14%)   | 0.11 |
| 2                                                     | 8 (5%)                                        | 0                 |                | Interventional                                                                                                                                                                                                                                                                                                                                                                                                                                                                      | 143 (89%) | 136 (85%)  | 0.24 |
| Size of main tumor (cm)                               |                                               |                   | 0.46           | Data are n (%) or Median (Interquartile Range). *Patients may have received more than one type of therapy. ALB = albumin; ALT = alanine transaminase; AST = aspartate amino transferase; BCLC = Barcelona Clinic Liver Cancer staging system; ECOG = Eastern Cooperative Oncology Group; IQR = interquartile range; TBIL = total bilirubin. Comparisons between two groups were performed using the <i>t</i> test for continuous data and the chi-square test for categorical data. |           |            |      |
| Median                                                | 4.2                                           | 4.3               |                |                                                                                                                                                                                                                                                                                                                                                                                                                                                                                     |           |            |      |
| IQR                                                   | 2.9–7.9                                       | 3.0–7.0           |                |                                                                                                                                                                                                                                                                                                                                                                                                                                                                                     |           |            |      |
| Size range of tumor                                   |                                               |                   | 0.73           |                                                                                                                                                                                                                                                                                                                                                                                                                                                                                     |           |            |      |
| ≤ 5 cm                                                | 92 (58%)                                      | 95 (59%)          |                |                                                                                                                                                                                                                                                                                                                                                                                                                                                                                     |           |            |      |
| > 5 cm                                                | 68 (43%)                                      | 65 (41%)          |                |                                                                                                                                                                                                                                                                                                                                                                                                                                                                                     |           |            |      |

**Supplemental Table 2** Types of previous interventional therapy

| Types of previous interventional therapy | TACE+ <sup>131</sup> I-metuximab<br>(n = 160) | TACE<br>(n = 160) | <i>P</i> value |
|------------------------------------------|-----------------------------------------------|-------------------|----------------|
| Transcatheter arterial chemoembolization | 101 (63%)                                     | 104 (65%)         |                |
| Transcatheter arterial embolization      | 26 (16%)                                      | 61 (38%)          |                |
| Hepatic arterial infusion chemotherapy   | 41 (26%)                                      | 46 (29%)          |                |
| Microwave ablation                       | 1 (1%)                                        | 0 (0%)            |                |
| Radiofrequency ablation                  | 1 (1%)                                        | 1 (1%)            |                |
| Total previous interventional therapy    | 143 (89%)                                     | 136 (85%)         | 0.24           |

Data are n (%). *P* value was calculated by chi-square test.

**Supplemental Table 3** Types of tumor recurrence

| Types of tumor recurrence        | TACE+ <sup>131</sup> I-metuximab<br>(n = 160) | TACE<br>(n = 160) | <i>P</i> value |
|----------------------------------|-----------------------------------------------|-------------------|----------------|
| New intrahepatic recurrence      | 100 (63%)                                     | 128 (80%)         | 0.001          |
| Intrahepatic residual recurrence | 102 (64%)                                     | 130 (81%)         | < 0.001        |
| Extrahepatic metastasis          | 52 (33%)                                      | 98 (61%)          | < 0.001        |

Data are n (%). *P* value was calculated by chi-square test.

**Supplemental Table 4** Summary of efficacy measures

| Outcomes                  | TACE+ <sup>131</sup> I-metuximab<br>(n = 160) | TACE<br>(n = 160) | Hazard ratio (95% CI) | <i>P</i> value |
|---------------------------|-----------------------------------------------|-------------------|-----------------------|----------------|
| Time to recurrence (mo)   |                                               |                   | 0.55 (0.43–0.70)      | < 0.001        |
| Median                    | 6                                             | 3                 |                       |                |
| 95% CI                    | 4.4–7.6                                       | 2.4–3.6           |                       |                |
| 6-mo recurrence rate (%)  | 52.1                                          | 79.1              |                       |                |
| 12-mo recurrence rate (%) | 69.7                                          | 90.3              |                       |                |
| 18-mo recurrence rate (%) | 78.8                                          | 94.8              |                       |                |
| 24-mo recurrence rate (%) | 86.3                                          | 94.8              |                       |                |
| 36-mo recurrence rate (%) | 87.7                                          | 96.3              |                       |                |
| Overall survival (mo)     |                                               |                   | 0.62 (0.47–0.82)      | 0.001          |
| Median                    | 28                                            | 19                |                       |                |
| 95% CI                    | 23.8–32.2                                     | 14.3–23.7         |                       |                |
| 1-yr survival rate (%)    | 80.5                                          | 63.9              |                       |                |
| 2-yr survival rate (%)    | 58.4                                          | 39.3              |                       |                |
| 3-yr survival rate (%)    | 34.6                                          | 23.6              |                       |                |
| 4-yr survival rate (%)    | 24.7                                          | 10.4              |                       |                |
| 5-yr survival rate (%)    | 14.8                                          | 6.9               |                       |                |

Data were analyzed by Kaplan-Meier method and log-rank test. CI = confidence interval.

**Supplemental Table 5** Incidence of drug-related adverse events\*

| Adverse events   | TACE+ <sup>131</sup> I-metuximab (n = 160) |         |         | TACE (n = 160) |         |         | <i>P</i> value <sup>†</sup> |              |
|------------------|--------------------------------------------|---------|---------|----------------|---------|---------|-----------------------------|--------------|
|                  | Any grade                                  | Grade 3 | Grade 4 | Any grade      | Grade 3 | Grade 4 | Any grade                   | Grade 3 or 4 |
| Fever            | 38 (24%)                                   | 13 (8%) | 0       | 33 (21%)       | 10 (6%) | 0       | 0.59                        | 0.67         |
| Pain             | 29 (18%)                                   | 5 (3%)  | 0       | 32 (20%)       | 4 (3%)  | 0       | 0.78                        | 1.00         |
| Vomiting         | 32 (20%)                                   | 5 (3%)  | 0       | 35 (22%)       | 6 (4%)  | 0       | 0.78                        | 1.00         |
| Ascites          | 3 (2%)                                     | 0       | 0       | 1 (1%)         | 0       | 0       | 0.62                        | NA           |
| Pleural effusion | 3 (2%)                                     | 0       | 0       | 2 (1%)         | 0       | 0       | 1.00                        | NA           |
| Biliary stenosis | 0                                          | 0       | 0       | 0              | 0       | 0       | NA                          | NA           |
| Fatigue          | 28 (18%)                                   | 1 (1%)  | 0       | 25 (16%)       | 0       | 0       | 0.76                        | 1.00         |
| Diarrhea         | 5 (3%)                                     | 0       | 0       | 3 (2%)         | 0       | 0       | 0.72                        | NA           |
| Haemoglobin      | 31 (19%)                                   | 1(1%)   | 0       | 21 (13%)       | 0       | 0       | 0.13                        | 1.00         |
| White blood cell | 55 (34%)                                   | 8 (5%)  | 0       | 21 (13%)       | 1 (1%)  | 0       | <0.001                      | 0.04         |
| Neutrophil       | 32 (20%)                                   | 5 (3%)  | 1 (1%)  | 10 (6%)        | 1 (1%)  | 1 (1%)  | <0.001                      | 0.28         |
| Platelet         | 61 (38%)                                   | 11 (7%) | 2 (1%)  | 61 (38%)       | 9 (6%)  | 1 (1%)  | 1.00                        | 0.52         |
| ALT              | 49 (31%)                                   | 3 (2%)  | 0       | 91 (57%)       | 7 (4%)  | 0       | <0.001                      | 0.34         |
| AST              | 54 (34%)                                   | 3 (2%)  | 0       | 97 (61%)       | 12 (8%) | 1 (1%)  | <0.001                      | 0.02         |
| TBIL             | 53 (33%)                                   | 4 (3%)  | 2 (1%)  | 89 (56%)       | 6 (4%)  | 0       | <0.001                      | 1.00         |
| ALB              | 22 (14%)                                   | 0       | 0       | 53 (33%)       | 0       | 0       | <0.001                      | NA           |
| Creatinine       | 6 (4)                                      | 0       | 0       | 11 (7%)        | 0       | 0       | 0.21                        | NA           |

Data are n (%). \*According to the version 4.0 of the National Cancer Institute's Common Terminology Criteria for adverse events. <sup>†</sup>*P* value was calculated by Fisher's exact test (two-sided). NA = not applicable; ALT = alanine aminotransferase; AST = aspartate aminotransferase; ALB = albumin; TBIL = total bilirubin.

**Supplemental Table 6** Types of death causes

| Types of death causes                   | TACE+ <sup>131</sup> I-metuximab | TACE      | <i>P</i> value |
|-----------------------------------------|----------------------------------|-----------|----------------|
|                                         | (n = 160)                        | (n = 160) |                |
| Intrahepatic tumor progression          | 51 (32%)                         | 45 (28%)  | 0.018          |
| Extrahepatic tumor progression          | 10 (6%)                          | 15 (9%)   |                |
| Systemic tumor progression              | 24 (15%)                         | 49 (31%)  |                |
| Chemotherapy-related toxic side effects | 1 (1%)                           | 2 (1%)    |                |
| Other causes                            | 7 (4%)                           | 2 (1%)    |                |
| Total death                             | 93 (58%)                         | 113 (71%) |                |

Data are n (%). *P* value was calculated by chi-square test.
